# Supplementary material for: One-pot synthesis of carbon nanodots for fluorescence turn-on detection of Ag+ based on the Ag+-induced enhancement of fluorescence
Source: Royal Society of Chemistry journal article supplement (doi:10.1039/c4tc02582b), 2015-01-01
Supplement: c4tc02582b1.pdf [file c4tc02582b1.pdf]

Electronic Supplementary Information

**One-Pot Synthesis of Carbon Nanodots for Fluorescence Turn-on Detection  
of Ag<sup>+</sup> based on the Ag<sup>+</sup>-Induced Enhancement of Fluorescence**

Xiaohui Gao,<sup>a,b</sup> Yizhong Lu,<sup>a,b</sup> Ruizhong Zhang,<sup>a,b</sup> Shuijian He,<sup>a,b</sup> Jian Ju,<sup>a</sup> Minmin Liu,<sup>a,b</sup>

Lei Li,<sup>a</sup> Wei Chen<sup>\*,a</sup>

<sup>a</sup>State Key Laboratory of Electroanalytical Chemistry, Changchun Institute of Applied  
Chemistry, Chinese Academy of Sciences, Changchun, Jilin 130022, China

<sup>b</sup>University of the Chinese Academy of Sciences, Beijing 100039, China

\*Corresponding author, email address: [weichen@ciac.ac.cn](mailto:weichen@ciac.ac.cn)

## Supplementary Results

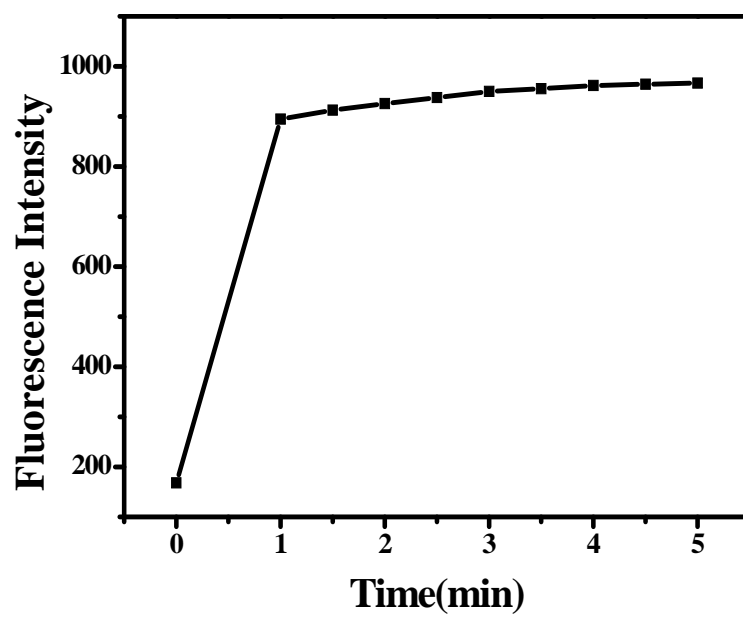

**Fig. S1** Dependence of fluorescence intensity of C-dots on the mixing time of C-dots and silver ions.
